# Supplementary material for: Heated Assembly and Transfer of Van der Waals Heterostructures with Common Nail Polish
Source: MDPI journal article supplement (doi:10.3390/nanomanufacturing1010005), 2021-06-15
Supplement: s1 [file s1]

Archive with 1 entries (1 files):
- nanomanufacturing-1240406-supplementary.pdf
